# Supplementary material
Source: PubMed Central journal article supplement (PMC5916843)
Supplement: NIHMS952840-supplement.pdf [file NIHMS952840-supplement.pdf]

**Molecular Cell**

**Supplemental Information**

**Polyamine Control of Translation Elongation  
Regulates Start Site Selection on the  
Antizyme Inhibitor mRNA via Ribosome Queuing**

**Ivaylo P. Ivanov, Byung-Sik Shin, Gary Loughran, Ioanna Tzani, Chune Cao,  
John F. Atkins and Thomas E. Dever**

**Figures S1 to S6**

**Tables S1 to S6**

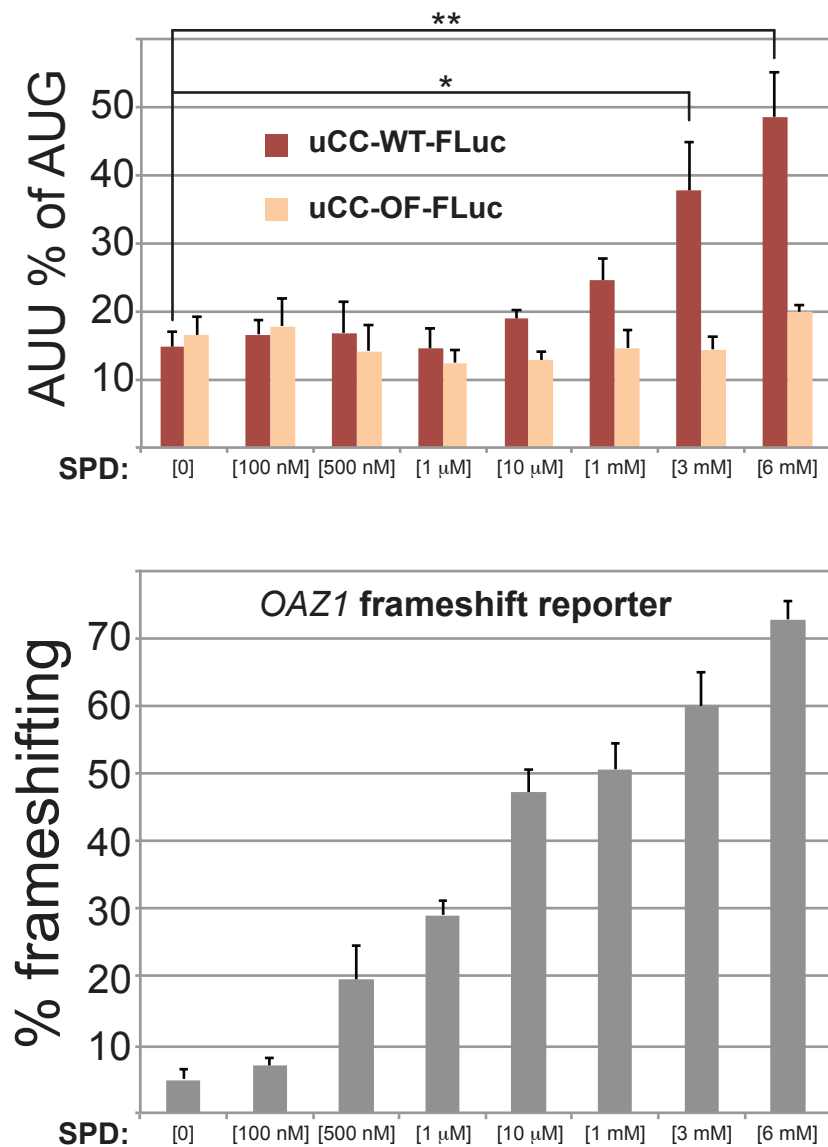

**Figure S1. Dose-dependent stimulation of AZIN1 uCC translation and antizyme frameshifting by spermidine – Related to Figure 1A**

The indicated uCC-Luc reporters from Figure 1A (upper panel) or a human antizyme OAZ1 dual-luciferase frameshift reporter (lower panel) were transfected in DFMO-treated HEK293T cells and then incubated in the presence of the indicated concentrations of spermidine.

(Upper panel) The percent AUU initiation and normalization to a co-transfected Renilla luciferase reporter initiated by AUG in perfect context were calculated as described in Figure 1A.

(Lower panel) +1 frameshifting was calculated relative to an in-frame reporter. Each data point represents the mean of four biological replicates, each done in duplicate. Error bars denote standard deviation. \* $p < 0.05$ , \*\* $p < 0.01$  (Student's two-tailed t-test,  $n=4$ ).

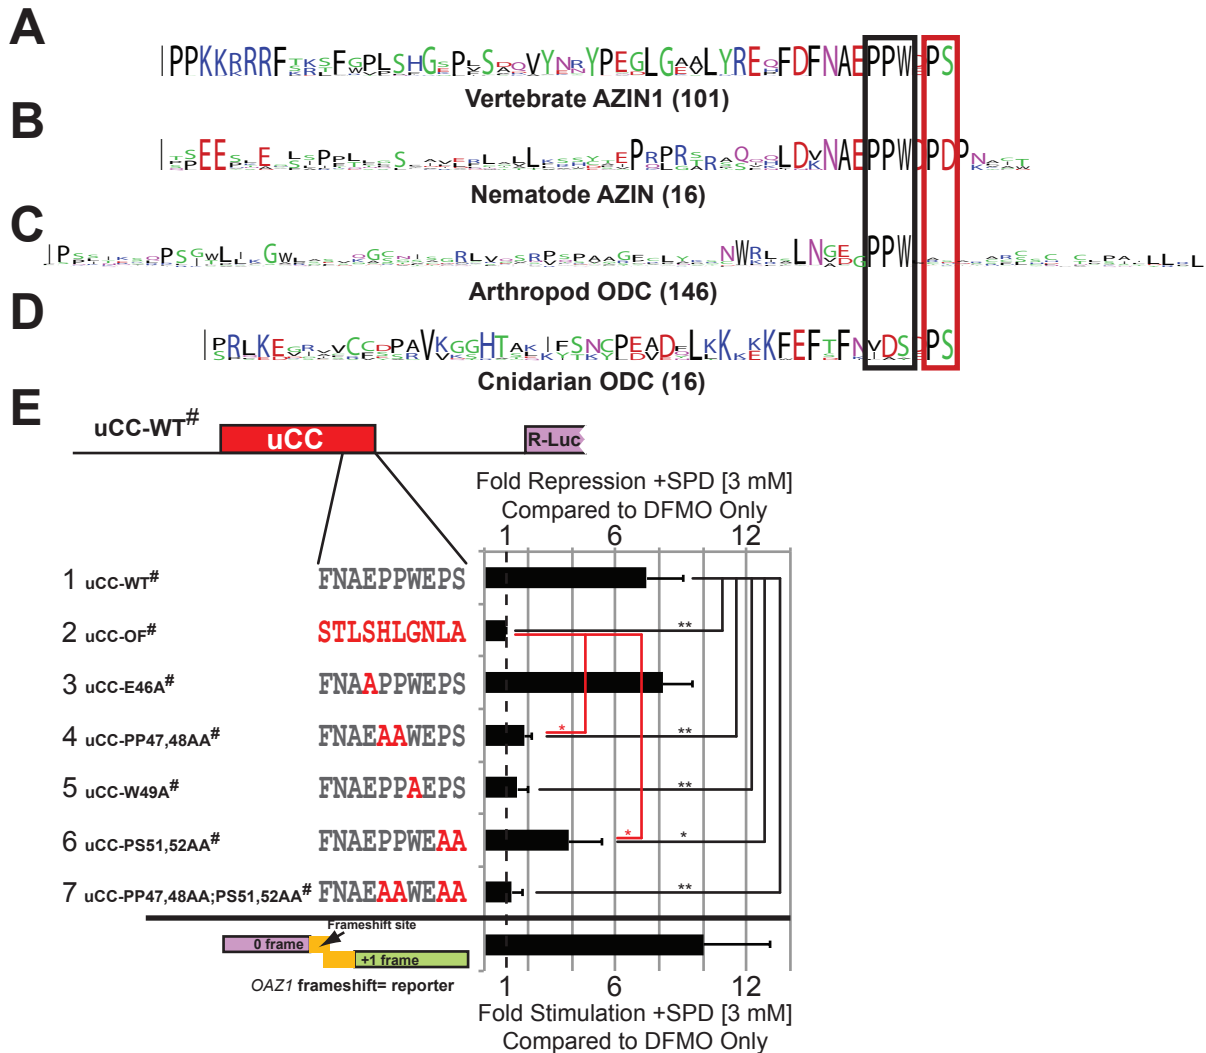

**Figure S2. Phylogenetic comparisons reveal that PPW and PS-stop are highly conserved, but discrete, motifs in metazoan homologs of ODC/AZIN and these motifs mediate polyamine regulatory effects of the AZIN1 uCC – Related to Figures 1B, 1C**

(A) Weblogo representation of amino acid conservation of uCCs in 101 orthologs of vertebrate AZIN1. (B) Conservation of uCCs in 16 homologs of AZIN in nematodes. Though the nematode uCC is an ortholog of the AZIN1 uCC, the nematode AZIN is not a true ortholog of vertebrate AZIN1 and instead arose as a result of a gene duplication that occurred independently in the nematode lineage (Ivanov et al., 2010b; Kurosinski et al., 2013).

(C) Conservation of uCCs in 146 arthropod ODC mRNAs.

(D) Conservation of uCCs in 16 cnidarian ODC mRNAs. In all WebLogos the starting residue is shown as isoleucine (corresponding to the AUU start codon); however, presumably translation is initiated by Met-tRNA<sup>iMet</sup>. The PPW and PS-stop motifs are boxed in black and red, respectively.

(E) (Top) Schematic of the AZIN1 reporter; the # symbol in the names of the reporters indicates that AUG start codons of the three conventional uORFs were mutated to AAA. The full 5' leader of mouse *azin1* mRNA with the AUG start codons of the three conventional uORFs mutated to AAA was fused upstream of Renilla luciferase. The “wild type” and “out-of-frame” reporters were described in Figure 6B, and for each reporter the amino acid changes relative to the wild type uCC are in red. HEK293T cells were pretreated, transfected and incubated as in Figure 1, and reporter normalization was performed as in Figure 6B. The fold repression in the presence of 3 mM SPD was calculated relative to the reporter in which the last 10 codons are out-of-frame (set at “1”). (Bottom) The human antizyme OAZ1 dual-luciferase frameshift reporter was examined in parallel and +1 frameshifting was calculated relative to an in-frame reporter. The fold stimulation indicates the increase in percent frameshifting in 3 mM vs. no SPD. Each data point represents the mean of four biological replicates, each done in duplicate. Error bars denote standard deviation. \* $p < 0.05$ , \*\* $p < 0.01$  (Student’s two-tailed t-test,  $n = 4$ ).

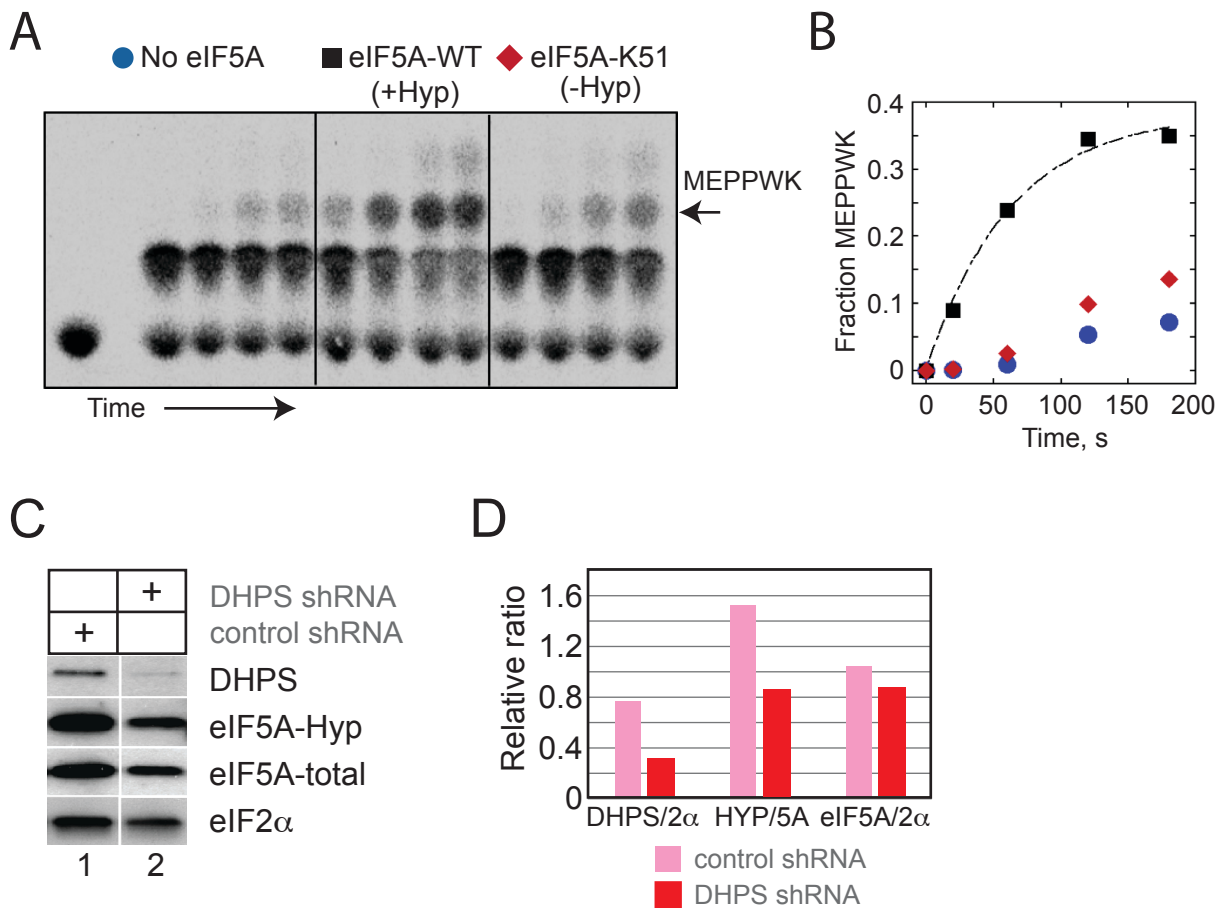

**Figure S3. Hypusination of eIF5A is required for in vitro synthesis of MEPPWK peptide and *DHPS* shRNA transfections reduce hypusination of eIF5A in cells – Related to Figures 4A,4G**

(A) Electrophoretic thin-layer chromatography (TLC) analysis of MEPPWK peptide synthesis in yeast in vitro reconstituted elongation assays performed in the presence of no eIF5A, hypsinated eIF5A (eIF5A-WT) or unmodified form of eIF5A (eIF5A-51K), as indicated.

(B) Fraction of MEPPWK synthesis in each reaction was plotted and fit to a single exponential equation (black squares, +WT hypsinated eIF5A; red diamonds, +unmodified eIF5A-K51; blue circles, -eIF5A).

(C) Western blot analysis of whole cell lysates from HEK293T cells pre-treated in 1 mM DFMO for 4 days, then transfected with control shRNAs or shRNAs against human *DHPS*. Transfectants were incubated an additional 48 hr in DFMO and then incubated for another 24 hr in DFMO supplemented with 1 M SPD. Immunoblot analysis of whole cell lysates was performed using antibodies against *DHPS*, hypsinated eIF5A, total eIF5A, or total eIF2α, as indicated.

(D) Relative levels of *DHPS*, hypsinated eIF5A, total eIF5A, and total eIF2α from panel (C) were determined by quantitative densitometry and NIH ImageJ software.

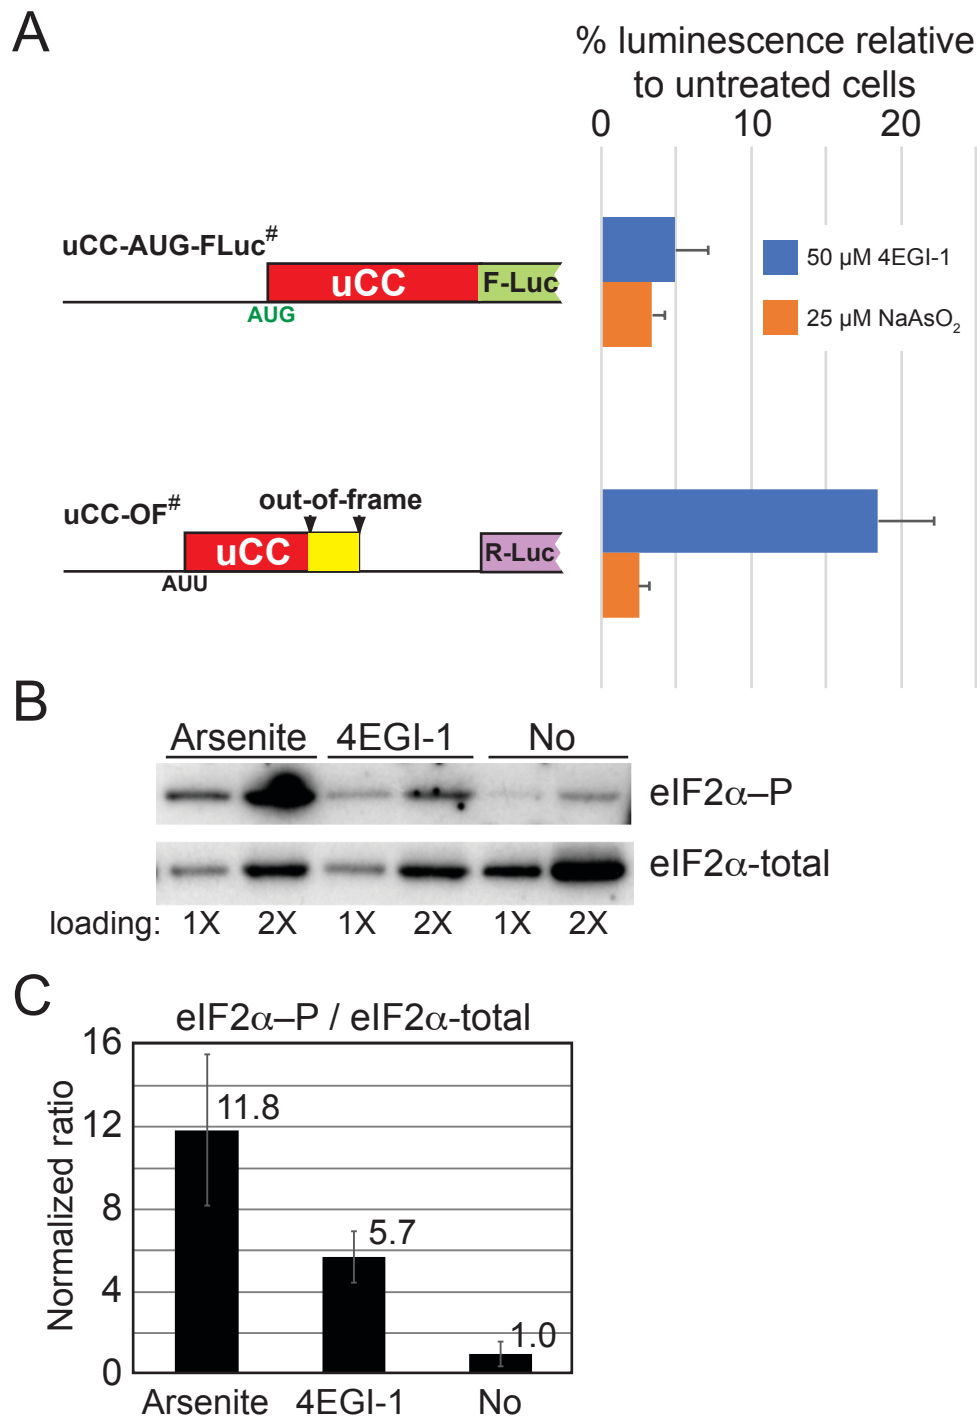

**Figure S4. Arsenite and 4EGI-1 treatments substantially impair luciferase activities from control reporters and impact eIF2 $\alpha$  phosphorylation – Related to Figures 6 and S8**

(A) The indicated control reporters, AUG-initiated uCC firefly luciferase fusion and “out-of-frame” uCC upstream of Renilla luciferase, which were used in Figures 6A-C and Figure S5A, respectively, were transfected in HEK293T cells. Luminescence of lysates from cells treated with 25  $\mu$ M arsenite or 50  $\mu$ M 4EGI-1 were compared to untreated cells.

(B) Western blot analysis of whole cell lysates from HEK293T cells treated with either 50  $\mu$ M 4EGI-1, as in Figures 6A-C, or 25  $\mu$ M arsenite, as in Figure S5B. Two different amounts of each cell extract differing by a factor of 2 were loaded in successive lanes and subjected to immunoblot analysis using rabbit monoclonal anti-eIF2 $\alpha$  (phospho-Ser51) or rabbit monoclonal anti-eIF2 $\alpha$  antibodies.

(C) Relative levels of phosphorylated and total eIF2 $\alpha$  from panel (A) were determined by quantitative densitometry and NIH ImageJ (1.46r) software and are shown as the average of the quantifications obtained from the two dilutions. Error bars are standard deviations; n=2 for arsenite and 4EGI-1, and n=4 for no treatment.

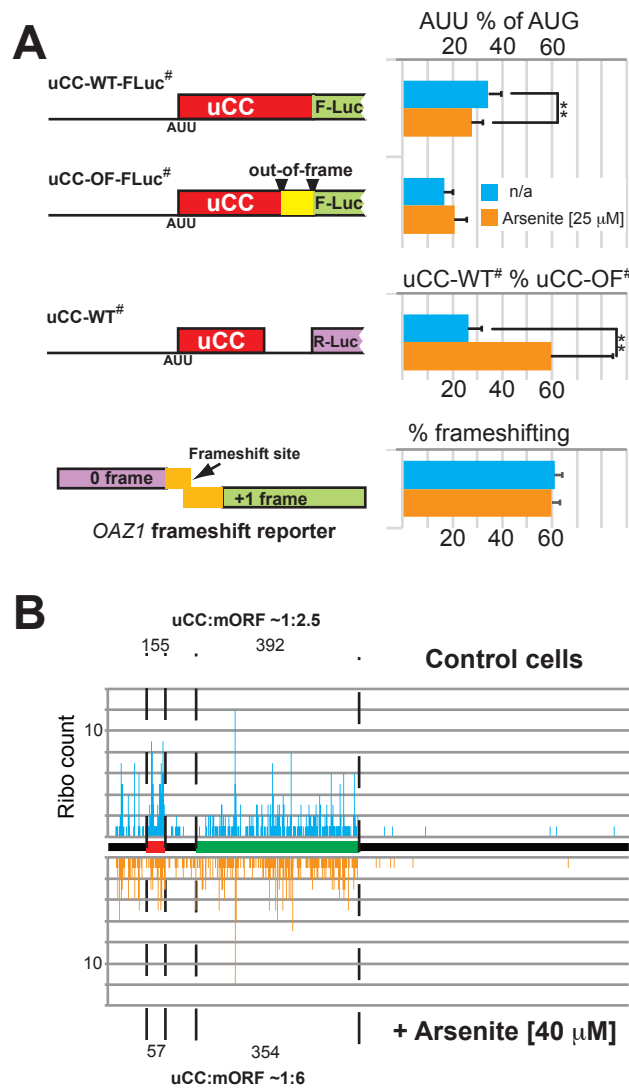

### Figure S5. Arsenite induces derepression of AZIN1 mORF translation – Related to Figure 6A-C

(A) (Top two constructs) To monitor uCC translation, HEK293T cells were transfected with the indicated uCC-Luc reporters and incubated for 18 hr in DMEM supplemented with 1 mM aminoguanidine and 1 mM SPD in the absence or presence of the 25 μM NaAsO<sub>2</sub>. Percent AUU initiation was calculated as described in Figure 1A, except that no normalizing co-transfected Renilla reporter was used. The # symbol in the names of the reporters indicates that the AUG start codon of uORF1 was mutated to AAA. (Third construct) To monitor AZIN1 synthesis, the full 5' leader of mouse azin1 mRNA with the AUG start codons of the three conventional uORFs mutated to AAA (as denoted by the # symbol in the name of the reporter) was fused upstream of Renilla luciferase. HEK293T cell transfectants were grown +/- 25 μM NaAsO<sub>2</sub> as described above. Wild type reporter activity was calculated as a percent of a reporter containing the out-of-frame uCC mutation (i.e. constitutively derepressed). (Bottom construct) To monitor levels of free polyamines, a dual-luciferase human antizyme OAZ1 frameshifting reporter was assayed in cells treated as described above. Percent +1 frameshifting was calculated relative to a dual-luciferase in-frame reporter. Each data point represents the mean of eight biological replicates, each performed in triplicate. Error bars denote standard deviation. \*\*p < 0.01 (Student's two-tailed t-test, n=8).

(B) Ribosome footprint raw data was obtained from (Andreev et al., 2015). Ribosome protected fragments from HEK293T cells grown under control conditions or in the presence of 40 μM sodium arsenite for 30 min were mapped to the mRNA of AZIN1. Total (not normalized) fragment counts were aligned to the AZIN1 mRNA assuming a 15-nt offset from the 5' end of protected fragments to the ribosomal A-site. Quantified fragment counts mapping to the uCC and mORF, red and green rectangles, respectively, and their relative ratio under each condition are indicated above (control conditions) and below (arsenite conditions) the ribosome profiles.

Gasterosteus aculeatus AZIN1-2 IPPKKK---KRS--VPSFC--FSASVYNNYPEDLGASLYREPPDFNAEPPWDPS  
 Trematomus bernacchii AZIN1-2 IPPKKK---KRS--VPSFC--FSANVYNNYPEDLGSLLHREPPDFNAEPPWDPS  
 Oreochromis niloticus AZIN1-2 IPPKKK---KRS--VPSFC--FSADVYNNYPEDLGAALYREPPDFNAEPPWDPS  
 Morone chrysops AZIN1-2 IPPKKK---KRS--VPSFC--FSADVYNNYPEDLGAALYREPPDFNAEPPWDPS  
 Micropterus salmoides AZIN1-2 IPPKKK---KRS--VPSFC--FSADVYNNYPEDLGAALYREPPDFNAEPPWDPS  
 Neolamprologus brichardi AZIN1-2 IPPKKK---KRS--VPSFC--FSADVYNNYPEDLGAALYREPPDFNAEPPWDPS  
 Haplochromis burtoni AZIN1-2 IPPKKK---KRS--VPSFC--FSADVYNNYPEDLGAALYREPPDFNAEPPWDPS  
 Maylandia zebra AZIN1-2 IPPKKK---KRS--VPSFC--FSADVYNNYPEDLGAALYREPPDFNAEPPWDPS  
 Lates calcarifer AZIN1-2 IPPKKK---KRS--VPSFC--FSADVYNNYPEDLGAALYREPPDFNAEPPWDPS  
 Morone saxatilis AZIN1-2 IPPKKK---KRS--VPSFC--FSADVYNNYPEDLGAALYREPPDFNAEPPWDPS  
 Miichthys miiuy AZIN1-2 IPPKKK---KRS--VPSGC--FSADVYNNYPEDLGAALYREPPDFNAEPPWDPS  
 Tripterygion delaisi AZIN1-2 IPPKKK---KRS--VPSVC--FSPDVYNNYPEDLGEALYREPPDFNAEPPWDPS  
 Oryzias latipes AZIN1-2 IPSKKK---KRS--VPCPR--ASSPNVYNNYPEDLGAALYREPPDFNAEPPWDPS  
 Notobranchius furzeri AZIN1-2 IPSKEK---KCS--VCRFR--PSVEVCNNYPEDLGAALYREPPDFNAEPPWDPS  
 Takifugu rubripes AZIN1-2 IPPKKK---KHS--LPTFC--VSADVYNNYPKDLGAALYKESDFNAEPPWDPS  
 Gadus morhua AZIN1-2 IPPKKK---KGS--IPSFC--LSAHAYN--YPEGLKALYREPPDFNAEPPWDPS  
 Salmo salar AZIN1-2 IPPKRR---KRS--TPNIG--FYSHVYNYYPEGLAALRREPPDFNAEPPWDPS  
 Oncorhynchus tshawytscha AZIN1-2 IPPKRR---KRS--TPNIG--FYSHVYNYYPEGLAALRREPPDFNAEPPWDPS  
 Oncorhynchus mykiss AZIN1-2 IPPKRR---KRS--TPNIG--FYSHVYNYYPEGLAALRREPPDFNAEPPWDPS  
 Osmerus mordax AZIN1-2 IPPKRR---KRS--TPNFG--FLSHVYNYYPEGLAALYREPPDFNAEPPWDPS  
 Petromyzon marinus AZIN1 IPPKKRRFRKRSFGTSLGV--YTEKVNIYPE--GRRLYQEQDFNAEPPWEPES  
 Danio rerio AZIN1 IPPKKRRFRKRSFRPLSHGSPSLSRVYKRYPEGLGEALYREDFNAEPPWDPS  
 Pimephales promelas AZIN1 IPPKKRRFRKRSFRPLSHGSPSLSRVYKRYPEGLGEALYREDFNAEPPWDPS  
 Sinocyclocheilus angustiporus Zacco platypus AZIN1 IPPKKRRFRKRSFRPLSHGSPSLSRVYKRYPEGLGEALYREDFNAEPPWDPS  
 Ictalurus furcatus AZIN1 IPPKKRRFRKRSFRPLSHGSPSLSRVYKRYPEGLGEALYREDFNAEPPWDPS  
 Tetraodon nigroviridis AZIN1 IPPKKRRFRKTFWPLSHGSPVSAQVYERYVPGGLAALYREDFNAEPPWDPS  
 Takifugu rubripes AZIN1 IPPKKRRFRKTFWPLSHGSPVSAQVYERYVPGGLAALYREDFNAEPPWDPS  
 Morone chrysops AZIN1 IPPKKRRFRKTFWPLSHGSPVSAQVYERYVPGGLAALYREDFNAEPPWDPS  
 Morone saxatilis AZIN1 IPPKKRRFRKTFWPLSHGSPVSAQVYERYVPGGLAALYREDFNAEPPWDPS  
 Dicentrarchus labrax AZIN1 IPPKKRRFRKTFWPLSHGSPVSAQVYERYVPGGLAALYREDFNAEPPWDPS  
 Maylandia zebra AZIN1 IPPKKRRFRKTFWPLSHGSPVSAQVYERYVPGGLAALYREDFNAEPPWDPS  
 Tripterygion delaisi AZIN1 IPPKKRRFRKTFWPLSHGSPVSAQVYERYVPGGLAALYREDFNAEPPWDPS  
 Miichthys miiuy AZIN1 IPPKKRRFRKTFWPLSHGSPVSAQVYERYVPGGLAALYREDFNAEPPWDPS  
 Oreochromis niloticus AZIN1 IPPKKRRFRKTFWPLSHGSPVSAQVYERYVPGGLAALYREDFNAEPPWDPS  
 Neolamprologus brichardi AZIN1 IPPKKRRFRKTFWPLSHGSPVSAQVYERYVPGGLAALYREDFNAEPPWDPS  
 Haplochromis burtoni AZIN1 IPPKKRRFRKTFWPLSHGSPVSAQVYERYVPGGLAALYREDFNAEPPWDPS  
 Ophthalmotilapia ventralis AZIN1 IPPKKRRFRKTFWPLSHGSPVSAQVYERYVPGGLAALYREDFNAEPPWDPS  
 Lates calcarifer AZIN1 IPPKKRRFRKTFWPLSHGSPVSAQVYERYVPGGLAALYREDFNAEPPWDPS  
 Micropterus salmoides AZIN1 IPPKKRRFRKTFWPLSHGSPVSAQVYERYVPGGLAALYREDFNAEPPWDPS  
 Monopterus albus AZIN1 IPPKKRRFRKTFWPLSHGSPVSAQVYERYVPGGLAALYREDFNAEPPWDPS  
 Paralichthys olivaceus AZIN1 IPPKKRRFRKTFWPLSHGSPVSAQVYERYVPGGLAALYREDFNAEPPWDPS  
 Notobranchius furzeri AZIN1 IPPKKRRFRKTFWPLSHGSPVSAQVYERYVPGGLAALYREDFNAEPPWDPS  
 Osmerus mordax AZIN1 IPPKKRRFRKTFWPLSHGSPVSAQVYERYVPGGLAALYREDFNAEPPWDPS  
 Plecoglossus altivelis AZIN1 IPPKKRRFRKTFWPLSHGSPVSAQVYERYVPGGLAALYREDFNAEPPWDPS  
 Gasterosteus aculeatus AZIN1 IPPKKRRFRSETFLPSHGFPVSAQVYERYVPGGLAALYREDFNAEPPWDPS  
 Gadus morhua AZIN1 IPPKKRRFRSKSLWPLSHGSPVSAQVYERYVPGGLAALYREDFNAEPPWDPS  
 Sebastes goodei AZIN1 IPPKKRRFRSKSLWPLSHGSPVSAQVYERYVPGGLAALYREDFNAEPPWDPS  
 Trematomus bernacchii AZIN1 IPPKKRRFRSESLWPLSHGSPVSAQVYERYVPGGLAALYREDFNAEPPWDPS  
 Fundulus heteroclitus AZIN1 IPPKKRRFRSKSFRPLSHGSPVSAQVYERYVPGGLAALYREDFNAEPPWDPS  
 Oryzias latipes AZIN1 IPPKKRRFRSKTFWPLSHGSPVSAQVYERYVPGGLAALYREDFNAEPPWDPS  
 Oncorhynchus mykiss AZIN1 IPPKKRRFRSETFPLSHGSLFSLQVYNYCYPEGLGASLYREDFNAEPPWDPS  
 Salmo salar AZIN1 IPPKKRRFRSETFPLSHGSLFSLQVYNYCYPEGLGASLYREDFNAEPPWDPS  
 Esox lucius AZIN1 IPPKKRRFRSETFWPLSHGSLFVQVYNYCYPEGLGASLYREDFNAEPPWDPS  
 Hynobius chinensis AZIN1 IPPKKRRFRSRSFWPFSHGG--FSLKVFN--YPEGLGEALYREDFNAEPPWEPES  
 Ovis aries AZIN1 IPPKKRRFRTRLFGPLSHGE--LSDQVYN--YPEGLGEVLYREDFNAEPPWEPES  
 Bos taurus AZIN1 IPPKKRRFRTRLFGPLSHGE--LSDQVYN--YPEGLGEVLYREDFNAEPPWEPES  
 Sus scrofa AZIN1 IPPKKRRFRTRLFGPLSHGE--LSDQVYN--YPEGLGEVLYREDFNAEPPWEPES  
 Spermophilus lateralis AZIN1 IPPKKRRFRTRLFGPLSHGE--LSDQVYN--YPEGLGEVLYREDFNAEPPWEPES  
 Homo sapiens AZIN1 IPPKKRRFRTRLFGPLSHGE--LSDQVYN--YPEGLGEVLYREDFNAEPPWEPES  
 Pan troglodytes verus AZIN1 IPPKKRRFRTRLFGPLSHGE--LSDQVYN--YPEGLGEVLYREDFNAEPPWEPES  
 Canis familiaris AZIN1 IPPKKRRFRTRLFGPLSHGE--LSDQVYN--YPEGLGEVLYREDFNAEPPWEPES  
 Pongo pygmaeus AZIN1 IPPKKRRFRTRLFGPLSHGE--LSDQVYN--YPEGLGEVLYREDFNAEPPWEPES  
 Camelus bactrianus AZIN1 IPPKKRRFRTRLFGPLSHGE--LSDQVYN--YPEGLGEVLYREDFNAEPPWEPES  
 Capra hircus AZIN1 IPPKKRRFRTRLFGPLSHGE--LSDQVYN--YPEGLGEVLYREDFNAEPPWEPES  
 Monodelphis domestica AZIN1 IPPKKRRFRTRLFGPLSHGE--LSDQVYN--YPEGLGEVLYREDFNAEPPWEPES  
 Trichosurus vulpecula AZIN1 IPPKKRRFRTRLFGPLSHGE--LSDQVYN--YPEGLGEVLYREDFNAEPPWEPES  
 Macropus eugenii AZIN1 IPPKKRRFRTRLFGPLSHGE--LSDQVYN--YPEGLGEVLYREDFNAEPPWEPES  
 Otlemur garnettii AZIN1 IPPKKRRFRTRLFGPLSHGE--LSDQVYN--YPEGLGEVLYREDFNAEPPWEPES  
 Loxodonta africana AZIN1 IPPKKRRFRTRLFGPLSHGE--LSDQVYN--YPEGLGEVLYREDFNAEPPWEPES  
 Ochotona princeps AZIN1 IPPKKRRFRTRLFGPLSHGE--LSDQVYN--YPEGLGEVLYREDFNAEPPWEPES  
 Macaca fascicularis AZIN1 IPPKKRRFRTRLFGPLSHGE--LSDQVYN--YPEGLGEVLYREDFNAEPPWEPES  
 Dasypus novemcinctus AZIN1 IPPKKRRFRTRLFGPLSHGE--LSDQVYN--YPEGLGEVLYREDFNAEPPWEPES  
 Macaca mulatta AZIN1 IPPKNIRFRTRLFGPLSHGE--LSDQVYN--YPEGLGEVLYREDFNAEPPWEPES  
 Rattus norvegicus AZIN1 IPPKKRRFRTRLFGPLSHGE--LSDQVYN--YPEGLGEVLYREDFNAEPPWEPES  
 Mus musculus AZIN1 IPPKKRRFRTRLFGPLSHGE--LSDQVYN--YPEGLGEVLYREDFNAEPPWEPES  
 Cavia porcellus AZIN1 IPPKKRRFRTRLFGPLSHGE--LSDQVYN--YPEGLGEVLYREDFNAEPPWEPES  
 Ctenomys sociabilis AZIN1 IPPKKRRFRTRLFGPLSHGE--LSDQVYN--YPEGLGEVLYREDFNAEPPWEPES  
 Atractaspis aterrima AZIN1 IPPKKRRFRTKSFGPLSHGK--LSDQVYN--YPEGLGEVLYREDFNAEPPWEPES  
 Crocodylus horridus AZIN1 IPPKKRRFRTKSFGPLSHGK--LSDQVYN--YPEGLGEVLYREDFNAEPPWEPES  
 Boiga irregularis AZIN1 IPPKKRRFRTKSFGPLSHGK--LSDQVYN--YPEGLGEVLYREDFNAEPPWEPES  
 Misonax fulvius AZIN1 IPPKKRRFRTKSFGPLSHGK--LSDQVYN--YPEGLGEVLYREDFNAEPPWEPES  
 Hypsiglena sp AZIN1 IPPKKRRFRTKSFGPLSHGK--LSDQVYN--YPEGLGEVLYREDFNAEPPWEPES  
 Crocodylus adamantinus AZIN1 IPPKKRRFRTKSFGPLSHGK--LSDQVYN--YPEGLGEVLYREDFNAEPPWEPES  
 Trachemys scripta elegans IPPKKRRFRTKSFGPLSHGK--LSDQVYN--YPEGLGEVLYREDFNAEPPWEPES  
 Anolis carolinensis AZIN1 IPPKKRRFRTKSFGPLSHGK--LSDQVYN--YPEGLGEVLYREDFNAEPPWEPES  
 Gallus gallus AZIN1 IPPKKRRFRTKSFGPLSHGK--LSDQVYN--YPEGLGEVLYREDFNAEPPWEPES  
 Meleagris gallopavo AZIN1 IPPKKRRFRTKSFGPLSHGK--LSDQVYN--YPEGLGEVLYREDFNAEPPWEPES  
 Carduelis chloris AZIN1 IPPKKRRFRTKSFGPLSHGK--LSDQVYN--YPEGLGEVLYREDFNAEPPWEPES  
 Squalus acanthias AZIN1 IPPKKRRFRTKSFGPLSHGK--LSDQVYN--YPEGLGEVLYREDFNAEPPWEPES  
 Callorhynchus milii AZIN1 IPPKKRRFRTKSFGPLSHGK--LSDQVYN--YPEGLGEVLYREDFNAEPPWEPES  
 Leucoraja erinacea AZIN1 IPPKKRRFRTKSFGPLSHGK--LSDQVYN--YPEGLGEVLYREDFNAEPPWEPES  
 Xenopus laevis AZIN1 IPPKKRRFRPNKSGPLPHGG--FVSKAYN--YPEGLGKALYREDFNAEPPWQPS  
 Xenopus tropicalis AZIN1 IPPKKRRFRPKSFGPLPHGG--FVSKAYN--YPEGLGKALYREDFNAEPPWQPS  
 Xenopus laevis AZIN1-2 IPPKKRRFRPKSFGPLPHGG--FVSKAYN--YPEGLGKALYREDFNAEPPWQPS  
 Rana clamitans AZIN1 IPPKKRRFRPKSFGPLPHGG--FVSKAYN--YPEGLGKALYREDFNAEPPWQPS  
 Pseudacris regilla AZIN1 IPPKKRRFRPKSFGPLPHGG--FVSKAYN--YPEGLGKALYREDFNAEPPWQPS  
 Anguilla japonica AZIN1 IPPKKRTAFTKTFWPLSYGA--ALPVGINGCAG--GAELHREQDFNAEPPWKPS  
 Danio rerio AZIN1-2 IPPKSRFRPSDARDFSR-----VYVNL--YENSLGTSVYREDFNAEPPWQPS  
 Pimephales promelas AZIN1-2 IPPKRRFRFNSALEFSH-----VFNVL--YENSLGTSVYREDFNAEPPWQPS  
 Ictalurus furcatus AZIN1-2 IPPKKRRFRNPTGNFSR-----LLVT--RQNCQTGAVVCREQDFNAEPPWQPS

**Figure S6. uCCs from AZIN1 orthologs in vertebrates contain naturally occurring deletions/insertions between the start codon and conserved C-terminus – Related to Figures 1B and 5**  
 Amino acid sequence alignment, generated by ClustalX, of 101 vertebrate AZIN1 uCCs. Species names are on the left. The uCCs in the two paralog of AZIN1 in boney fish differ in length by 7 residues. The starting residue is shown as isoleucine (corresponding to the AUU start codon); however, presumably translation is initiated by Met-tRNA<sub>i</sub><sup>Met</sup>. Deletions are represented by dashes highlighted in magenta.

**Table S1. Relative reporter mRNA levels – Related to Figures 1A, 1C**

| plasmid # | plasmid name           | treatment | FFLuc RNA levels<br>(860 DFMO set at 1) |       | FFLuc mRNA levels<br>(all DFMO values set at 1) |       |
|-----------|------------------------|-----------|-----------------------------------------|-------|-------------------------------------------------|-------|
|           |                        |           |                                         | stdev |                                                 | stdev |
| 854       | uCC-WT-Fluc AUU        | DFMO      | 1.19                                    | 0.23  | 1.00                                            | 0.19  |
| 854       | uCC-WT-Fluc AUU        | 3 mM SPD  | 5.37                                    | 4.00  | 4.51                                            | 3.36  |
| 860       | uCC-WT-Fluc AUG        | DFMO      | 1.00                                    | 0.06  | 1.00                                            | 0.06  |
| 860       | uCC-WT-Fluc AUG        | 3 mM SPD  | 4.08                                    | 1.23  | 4.07                                            | 1.23  |
| 862       | uCC-OF-Fluc AUU        | DFMO      | 1.17                                    | 0.17  | 1.00                                            | 0.14  |
| 862       | uCC-OF-Fluc AUU        | 3 mM SPD  | 3.43                                    | 0.15  | 2.92                                            | 0.13  |
| 868       | uCC-OF-Fluc AUG        | DFMO      | 1.10                                    | 0.03  | 1.00                                            | 0.03  |
| 868       | uCC-OF-Fluc AUG        | 3 mM SPD  | 2.99                                    | 1.28  | 2.71                                            | 1.16  |
| 2171      | uCC-PP47,48AA-FLuc AUU | DFMO      | 0.65                                    | 0.08  | 1.00                                            | 0.13  |
| 2171      | uCC-PP47,48AA-FLuc AUU | 3 mM SPD  | 2.84                                    | 1.18  | 4.39                                            | 1.82  |
| 2138      | uCC-PP47,48AA-FLuc AUG | DFMO      | 0.87                                    | 0.07  | 1.00                                            | 0.08  |
| 2138      | uCC-PP47,48AA-FLuc AUG | 3 mM SPD  | 3.08                                    | 0.14  | 3.52                                            | 0.16  |

Relative reporter mRNA levels for experiments in Figure 1A,C determined by qPCR. Normalization controls set at 1 are highlighted in yellow. Standard deviation based on two biological replicates.



**Table S2. Relative reporter mRNA levels – Related to Figure 3B**

---

| plasmid # | plasmid name          | treatment | FFLuc RNA levels<br>(2260 no Arg set at 1) |       | FFLuc mRNA levels<br>(all no Arg values set at 1) |       |
|-----------|-----------------------|-----------|--------------------------------------------|-------|---------------------------------------------------|-------|
|           |                       |           |                                            | stdev |                                                   | stdev |
| 2255      | uCC-AAP-Fluc AUU      | no Arg    | 0.80                                       | 0.08  | 1.00                                              | 0.10  |
| 2255      | uCC-AAP-Fluc AUU      | 25 mM Arg | 1.52                                       | 0.41  | 1.90                                              | 0.51  |
| 2260      | uCC-AAP-Fluc AUUG     | no Arg    | 1.01                                       | 0.17  | 1.00                                              | 0.17  |
| 2260      | uCC-AAP-Fluc AUG      | 25 mM Arg | 2.06                                       | 0.60  | 2.05                                              | 0.60  |
| 2256      | uCC-AAP-D12N-Fluc AUU | no Arg    | 0.51                                       | 0.08  | 1.00                                              | 0.16  |
| 2256      | uCC-AAP-D12N-Fluc AUU | 25 mM Arg | 0.70                                       | 0.16  | 1.39                                              | 0.31  |
| 2261      | uCC-AAP-D12N-Fluc AUG | no Arg    | 0.86                                       | 0.09  | 1.00                                              | 0.11  |
| 2261      | uCC-AAP-D12N-Fluc AUG | 25 mM Arg | 1.89                                       | 0.23  | 2.19                                              | 0.26  |

---

Relative reporter mRNA levels for experiments in Figure 3B determined by qPCR. Normalization controls set at 1 are highlighted in yellow. Standard deviation based on two biological replicates.

**Table S3. Relative reporter mRNA levels – Related to Figures 6A, 6B, 6D**

| plasmid # | plasmid name     | treatment         | FFLuc RNA levels<br>(2324 no 4EGI-1 set at 1) |       | FFLuc mRNA levels<br>(all no 4EGI-1 values set at 1) |       |
|-----------|------------------|-------------------|-----------------------------------------------|-------|------------------------------------------------------|-------|
|           |                  |                   |                                               | stdev |                                                      | stdev |
| 2109      | uCC-WT-Fluc# AUU | no 4EGI-1         | 1.09                                          | 0.44  | 1.00                                                 | 0.40  |
| 2109      | uCC-WT-Fluc# AUU | 50 $\mu$ M 4EGI-1 | 1.80                                          | 1.25  | 1.65                                                 | 1.15  |
| 2324      | uCC-WT-Fluc# AUG | no 4EGI-1         | 1.00                                          | 0.04  | 1.00                                                 | 0.04  |
| 2324      | uCC-WT-Fluc# AUG | 50 $\mu$ M 4EGI-1 | 1.07                                          | 0.55  | 1.07                                                 | 0.55  |
| 5475      | uCC-OF-Fluc# AUU | no 4EGI-1         | 1.04                                          | 0.34  | 1.00                                                 | 0.33  |
| 5475      | uCC-OF-Fluc# AUU | 50 $\mu$ M 4EGI-1 | 1.36                                          | 0.01  | 1.31                                                 | 0.01  |
| 5476      | uCC-OF-Fluc# AUG | no 4EGI-1         | 1.14                                          | 0.21  | 1.00                                                 | 0.18  |
| 5476      | uCC-OF-Fluc# AUG | 50 $\mu$ M 4EGI-1 | 1.73                                          | 0.36  | 1.52                                                 | 0.32  |

| plasmid # | plasmid name | treatment         | RLuc RNA levels<br>(5320 no 4EGI-1 set at 1) |       | RLuc mRNA levels<br>(all no 4EGI-1 values set at 1) |       |
|-----------|--------------|-------------------|----------------------------------------------|-------|-----------------------------------------------------|-------|
|           |              |                   |                                              | stdev |                                                     | stdev |
| 5320      | uCC-WT#      | no 4EGI-1         | 1.00                                         | 0.07  | 1.00                                                | 0.07  |
| 5320      | uCC-WT#      | 50 $\mu$ M 4EGI-1 | 2.15                                         | 0.05  | 2.14                                                | 0.05  |
| 5321      | uCC-OF#      | no 4EGI-1         | 0.76                                         | 0.19  | 1.00                                                | 0.26  |
| 5321      | uCC-OF#      | 50 $\mu$ M 4EGI-1 | 1.82                                         | 0.19  | 2.41                                                | 0.25  |

| plasmid # | plasmid name | treatment | RLuc RNA levels<br>(5817 DFMO set at 1) |       | RLuc mRNA levels<br>(all DFMO values set at 1) |       |
|-----------|--------------|-----------|-----------------------------------------|-------|------------------------------------------------|-------|
|           |              |           |                                         | stdev |                                                | stdev |
| 5802      | AAA-AUU WT   | DFMO      | 0.53                                    | 0.17  | 1.00                                           | 0.33  |
| 5802      | AAA-AUU WT   | 6 mM SPD  | 2.45                                    | 0.17  | 4.67                                           | 0.32  |
| 5803      | AUU-AAA WT   | DFMO      | 0.39                                    | 0.02  | 1.00                                           | 0.06  |
| 5803      | AUU-AAA WT   | 6 mM SPD  | 2.14                                    | 0.04  | 5.50                                           | 0.11  |
| 5817      | AAA-AAA OF   | DFMO      | 1.00                                    | 0.89  | 1.00                                           | 0.89  |
| 5817      | AAA-AAA OF   | 6 mM SPD  | 1.06                                    | 0.02  | 1.06                                           | 0.02  |

Relative reporter mRNA levels for experiments in Figure 6A (plasmids 2109-5476), Figure 6B (plasmids 5320-5321), and Figure 6D (plasmids 5802-5817) determined by qPCR. Normalization controls set at 1 for each group are highlighted in yellow. Standard deviation based on two biological replicates.

**Table S4. Oligonucleotides used in this study – Related to STAR Methods**

| <b>Name</b>      | <b>Sequence</b>                                        |
|------------------|--------------------------------------------------------|
| AZIUTR/S2        | CCAAAGCTTCTCTCGCCGCGGTGTTTCCG                          |
| UTRD2/A m5 BamHI | CCAGGATCCAGCTAGGTTCCCAAGGTGGCTC                        |
| E50del/A         | CCAGGATCCCCAAGGTGGCTCAGCGTTG                           |
| PPAA/A           | CCAGGATCCGCTAGGTTCCCAAGCTGCCTCAGCGTTGAAG               |
| PSAA/A           | CCAGGATCCGGCAGCTTCCCAAGGTGGCTCAGCG                     |
| WA/A             | CCAGGATCCGCTAGGTTCCGCAGGTGGCTCAGCGTTGAAG               |
| EA/A             | CCAGGATCCGCTAGGTTCCCAAGGTGGCGCAGCGTTGAAGTCG            |
| AAPLNG/A         | CCAGGATCCGCTGTTGAGAGCTCTCCAGAGATGATCGCTCAGGTAAT        |
| AAP/A            | CCAGAGATGATCGCTCAGGTAATCCTGTGATGTCAGCACTTCTCCTAGGCCTTC |
| AAPM/A           | CCAGAGATGATCGCTCAGGTAATCCTGTGATGTCAGCACTTCTCCTAGGCCTTC |
| OCC1197          | ACGTCGTCCCCGCAGCCTAAAGCCCAGGCCGCCTTGGGTATT             |
| OCC1198          | AATACCCAAGGCGGCCTGGGCTTTAGGCTGCGGGGACGACGT             |
| AZIUTR/S2        | CCAAAGCTTCTCTCGCCGCGGTGTTTCCG                          |
| AZIM2/A          | CCACTCGGGTTTCATCTCAGCCGTATCCACAAAGCCGAAAGTTTTAAACCAGGA |
| AUU/S            | CATCCCTCTTTAAAAATTCCGCCGAAAAGA                         |
| AUU/A            | TCTTTTTCGGCGGAATTTTTAAAGAGGGATG                        |
| M5M6/S           | GAACCTAGCTTGAAAATAGGGGGTTCCA                           |
| M5M6/A           | TGGAACCCCTATTTTCAAGCTAGGTTT                            |
| M1M2M6PPAA/S     | CTTCAACGCTGAGGCAGCTTGGGAACCTAGCTGAAAATAGGGGGTTTC       |
| M1M2M6PPAA/A     | GAACCCCTATTTTCAGCTAGGTTCCCAAGCTGCCTCAGCGTTGAAG         |
| M1M2M6PSAA/S     | CCACCTTGGGAAGCTGCCTGAAAATAGGGGGTTCCATCTCC              |
| M1M2M6PSAA/A     | GGAGATGGAACCCCTATTTTCAGGCAGCTTCCCAAGGTGG               |
| M1M2M6W49A/S     | CTGAGCCACCTGCGGAACCTAGCTGAAAATAGGGGGTTCC               |
| M1M2M6W49A/A     | GGAACCCCTATTTTCAGCTAGGTTCCGCAGGTGGCTCAG                |
| M1M2M6E46A/S     | CTTCAACGCTGCGCCACCTTGGGAACCTAGCTGAAAATAGGGGGTTTC       |
| M1M2M6E46A/A     | GGAACCCCTATTTTCAGCTAGGTTCCCAAGGTGGCGCAGCGTTGAAG        |
| M1M2M6PPPSAAAA/S | CAACGCTGAGGCAGCTTGGGAAGCTGCCTGAAAATAGGGGGTTCC          |
| M1M2M6PPPSAAAA/A | GGAACCCCTATTTTCAGGCAGCTTCCCAAGCTGCCTCAGCGTTG           |
| M1M2M6W49ASP/S   | CGCTGAGCCACCTGCGGAACCTCCATGAAAATAGGGGGTTCC             |
| M1M2M6W49ASP/A   | GGAACCCCTATTTTCATGGAGGTCCGCAGGTGGCTCAGCG               |
| hAZ1WT/S         | GTCCCTCGAGGGTCTCCCTCCACTGCTGTAGTAAC                    |
| hAZ1WT/A         | GTCCAGATCTTGAAAGATTGTGATCCCTCTGACTATT                  |

**Table S5. Plasmids used in this study – Related to STAR Methods**

| <b>Construct #</b> | <b>Construct name</b>    | <b>start</b> | <b>template</b>   | <b>S primer</b>                    | <b>AS primer/s</b>           |
|--------------------|--------------------------|--------------|-------------------|------------------------------------|------------------------------|
| 862                | uCC-OF-FLuc (AUU)        | <b>AUU</b>   | phRL-M5           | AZI/UTR-S2                         | UTRD2/A m5 BamHI             |
| 868                | uCC-OF-FLuc (AUG)        | <b>AUG</b>   | phRL-M4M5         | AZI/UTR-S2                         | UTRD2/A m5 BamHI             |
| 2121               | uCC-PS51,52DD-FLuc (AUU) | <b>AUU</b>   | phRL-WT           | AZI/UTR-S2                         | E50del/A                     |
| 2171               | uCC-PP47,48AA-FLuc (AUU) | <b>AUU</b>   | phRL-WT           | AZI/UTR-S2                         | PPAA/A                       |
| 2125               | uCC-PS51,52AA-FLuc (AUU) | <b>AUU</b>   | phRL-WT           | AZI/UTR-S2                         | PSAA/A                       |
| 2127               | uCC-W49A-FLuc (AUU)      | <b>AUU</b>   | phRL-WT           | AZI/UTR-S2                         | WA/A                         |
| 2326               | uCC-E50A-FLuc (AUU)      | <b>AUU</b>   | phRL-WT           | AZI/UTR-S2                         | EA/A                         |
| 2135               | uCC-PS51,52DD-FLuc (AUG) | <b>AUG</b>   | phRL-M4           | AZI/UTR-S2                         | E50del/A                     |
| 2138               | uCC-PP47,48AA-FLuc (AUG) | <b>AUG</b>   | phRL-M4           | AZI/UTR-S2                         | PPAA/A                       |
| 2140               | uCC-PS51,52AA-FLuc (AUG) | <b>AUG</b>   | phRL-M4           | AZI/UTR-S2                         | PSAA/A                       |
| 2141               | uCC-W49A-FLuc (AUG)      | <b>AUG</b>   | phRL-M4           | AZI/UTR-S2                         | WA/A                         |
| 2361               | uCC-E50A-FLuc (AUG)      | <b>AUG</b>   | phRL-M4           | AZI/UTR-S2                         | EA/A                         |
| 2255               | uCC-AAP-FLuc (AUU)       | <b>AUU</b>   | phRL-WT           | AZI/UTR-S2                         | AAPLNG/A + AAP/A             |
| 2256               | uCC-AAP-D12N-FLuc (AUU)  | <b>AUU</b>   | phRL-WT           | AZI/UTR-S2                         | AAPLNG/A + AAPM/A            |
| 2260               | uCC-AAP-FLuc (AUG)       | <b>AUG</b>   | phRL-M4           | AZI/UTR-S2                         | AAPLNG/A + AAP/A             |
| 2261               | uCC-AAP-D12N-FLuc (AUG)  | <b>AUG</b>   | phRL-M4           | AZI/UTR-S2                         | AAPLNG/A + AAPM/A            |
| 2109               | uCC-WT-FLuc#             | <b>AUU</b>   | phRL-M1           | AZI/UTR-S2                         | UTRD2/A BamHI                |
| 2324               | uCC-WT-FLuc#             | <b>AUG</b>   | phRL-M1M4         | AZI/UTR-S2                         | UTRD2/A BamHI                |
| 5375               | uCC-OF-FLuc#             | <b>AUU</b>   | uCC-OF-FLuc (AUU) | OCC1197                            | OCC1198                      |
| 5376               | uCC-OF-FLuc#             | <b>AUG</b>   | uCC-OF-FLuc (AUG) | OCC1197                            | OCC1198                      |
| 5320               | uCC-WT#                  | N/A          | phRL-M1M2M3M6     | AZIUTR/S2;<br>AUU/S                | AUU/A; AZIM2/A               |
| 5321               | uCC-OF#                  | N/A          | phRL-M1M2M5       | AZIUTR/S2;<br>M5M6/S               | M5M6/A; AZIM2/A              |
| 5325               | uCC-E46A#                | N/A          | phRL-M1M2         | AZIUTR/S2;<br>M1M2M6E46A/S         | M1M2M6E46A/A; AZIM2/A        |
| 5322               | uCC-PP47,48AA#           | N/A          | phRL-M1M2         | AZIUTR/S2;<br>M1M2M6PPAA/S         | M1M2M6PPAA/A; AZIM2/A        |
| 5324               | uCC-W49A#                | N/A          | phRL-M1M2         | AZIUTR/S2;<br>M1M2M6W49A/S         | M1M2M6W49A/A; AZIM2/A        |
| 5323               | uCC-PS51,52AA#           | N/A          | phRL-M1M2         | AZIUTR/S2;<br>M1M2M6PSAA/S         | M1M2M6PSAA/A; AZIM2/A        |
| 5326               | uCC-PP47,48AA;PS51,52AA# | N/A          | phRL-M1M2         | AZIUTR/S2;<br>M1M2M6PPPSAA<br>AA/S | M1M2M6PPPSAAAA/A;<br>AZIM2/A |
| 3007               | hAZ1-WT                  | N/A          | AZ-1wt            | hAZ1WT/S                           | hAZ1WT/A                     |
| 3008               | hAZ1-IF                  | N/A          | AZ-1if            | hAZ1WT/S                           | hAZ1WT/A                     |
| 5802               | uCC-AAA-AUU-WT#          | N/A          | see Table S6      | see Table S6                       | see Table S6                 |
| 5803               | uCC-AUU-AAA-WT#          | N/A          | see Table S6      | see Table S6                       | see Table S6                 |
| 5817               | uCC-AAA-AAA-OF#          | N/A          | see Table S6      | see Table S6                       | see Table S6                 |

Start, initiating codon for uCC; S (sense) and AS (antisense) primers for PCR.

**Table S6. Synthetic inserts used to generate 5' extended *azin1* uCC reporters – Related to STAR Methods**

| Plasmid name (#)          | Synthetic sequence cloned between HindIII and Accl sites of plasmids “5320” or “5321”                                                                                                                                                                                                                                                                                                                                                                                                                                               |
|---------------------------|-------------------------------------------------------------------------------------------------------------------------------------------------------------------------------------------------------------------------------------------------------------------------------------------------------------------------------------------------------------------------------------------------------------------------------------------------------------------------------------------------------------------------------------|
| uCC-AAA-AUU-WT#<br>(5802) | <p><u>AAGCTTAGTTAAAA</u><b>AAA</b>CCGAGTAAACTGGTGGCTCTTCAAATTTGATTGGGCTGCTCGCTTCAGCC<br/>           CCAAAGTTAGCCTACCTAAAACAAAACCTATCTCTCCAGGGTCTTCTAAGTCAGAGACATCAAACCTG<br/>           GACCTTCTGGATTACAGGCCAAATTAGCAAGTTTAAAGAAAGTCCACCAAGAAACGCAG<b>AAAAATT</b>CCGC<br/> <b>CGAAAAAGAGAAGACGCTTTACCCGACTCTTTGGGCCGTTATCTCAC</b>GTAAGTATCAAGGTTACAAGAC<br/>           AGGTTTAAAGGAGACCAATAGAAACTGGGCTTGTCGAGACAGAGAAGACTCTTGCGTTTCTGATAGGCAC<br/>           CTATTGGTCTTACTGACATCCACTTTGCCTTTCTCTCCACAGGGCGAACTTTCTGACCGAGTATAC</p> |
| uCC-AUU-AAA-WT#<br>(5803) | <p><u>AAGCTTAGTTAAAA</u><b>ATT</b>CCGAGTAAACTGGTGGCTCTTCAAATTTGATTGGGCTGCTCGCTTCAGCC<br/>           CCAAAGTTAGCCTACCTAAAACAAAACCTATCTCTCCAGGGTCTTCTAAGTCAGAGACATCAAACCTG<br/>           GACCTTCTGGATTACAGGCCAAATTAGCAAGTTTAAAGAAAGTCCACCAAGAAACGCAG<b>AAAAAAA</b>CCGC<br/> <b>CGAAAAAGAGAAGACGCTTTACCCGACTCTTTGGGCCGTTATCTCAC</b>GTAAGTATCAAGGTTACAAGAC<br/>           AGGTTTAAAGGAGACCAATAGAAACTGGGCTTGTCGAGACAGAGAAGACTCTTGCGTTTCTGATAGGCAC<br/>           CTATTGGTCTTACTGACATCCACTTTGCCTTTCTCTCCACAGGGCGAACTTTCTGACCGAGTATAC</p> |
| uCC-AAA-AAA-OF#<br>(5817) | <p><u>AAGCTTAGTTAAAA</u><b>AAA</b>CCGAGTAAACTGGTGGCTCTTCAAATTTGATTGGGCTGCTCGCTTCAGCC<br/>           CCAAAGTTAGCCTACCTAAAACAAAACCTATCTCTCCAGGGTCTTCTAAGTCAGAGACATCAAACCTG<br/>           GACCTTCTGGATTACAGGCCAAATTAGCAAGTTTAAAGAAAGTCCACCAAGAAACGCAG<b>AAAAAAA</b>CCGC<br/> <b>CGAAAAAGAGAAGACGCTTTACCCGACTCTTTGGGCCGTTATCTCAC</b>GTAAGTATCAAGGTTACAAGAC<br/>           AGGTTTAAAGGAGACCAATAGAAACTGGGCTTGTCGAGACAGAGAAGACTCTTGCGTTTCTGATAGGCAC<br/>           CTATTGGTCTTACTGACATCCACTTTGCCTTTCTCTCCACAGGGCGAACTTTCTGACCGAGTATAC</p> |

Extension sequence derived from *Trip12* is shown in blue letters. Sequence of synthetic intron within the uCC is shown in red letters. Nucleotides of the uCC are highlighted in yellow. AUU near-cognate start codons are highlighted in green. Non-cognate AAA codons are highlighted in red. *HindIII* and *Accl* cloning sites are underlined.
